# Supplementary material for: Choosing primary endpoints for clinical trials of health care interventions
Source: PubMed Central journal article supplement — Contemp Clin Trials Commun. 2019 Nov 12;16:100486. doi: 10.1016/j.conctc.2019.100486 (PMC6881606; doi:10.1016/j.conctc.2019.100486), 2019-11-12
Supplement: mmc1.pdf [file mmc1.pdf]

| <input type="checkbox"/> | # ▲ Searches                                                                                                                                                                                                                                                                                                                                             | Results | Type     | Actions                                                | Annotations |
|--------------------------|----------------------------------------------------------------------------------------------------------------------------------------------------------------------------------------------------------------------------------------------------------------------------------------------------------------------------------------------------------|---------|----------|--------------------------------------------------------|-------------|
| <input type="checkbox"/> | 1 exp Endpoint Determination/                                                                                                                                                                                                                                                                                                                            | 5848    | Advanced | <a href="#">Display Results</a> <a href="#">More ▼</a> |             |
| <input type="checkbox"/> | 2 "endpoint determination".mp. [mp=title, abstract, original title, name of substance word, subject heading word, floating sub-heading word, keyword heading word, protocol supplementary concept word, rare disease supplementary concept word, unique identifier, synonyms]                                                                            | 5954    | Advanced | <a href="#">Display Results</a> <a href="#">More ▼</a> |             |
| <input type="checkbox"/> | 3 (end?point* adj3 (composite or multiple or individual?* or combination or biomarker* or surrogate)).mp. [mp=title, abstract, original title, name of substance word, subject heading word, floating sub-heading word, keyword heading word, protocol supplementary concept word, rare disease supplementary concept word, unique identifier, synonyms] | 6776    | Advanced | <a href="#">Display Results</a> <a href="#">More ▼</a> |             |
| <input type="checkbox"/> | 4 exp "Outcome Assessment (Health Care)"/cl, hi, mt, st, sn [Classification, History, Methods, Standards, Statistics & Numerical Data]                                                                                                                                                                                                                   | 15273   | Advanced | <a href="#">Display Results</a> <a href="#">More ▼</a> |             |
| <input type="checkbox"/> | 5 exp Research Design/                                                                                                                                                                                                                                                                                                                                   | 408727  | Advanced | <a href="#">Display Results</a> <a href="#">More ▼</a> |             |
| <input type="checkbox"/> | 6 exp Clinical Trials as Topic/cl, hi, is, mt, st, sn, ut [Classification, History, Instrumentation, Methods, Standards, Statistics & Numerical Data, Utilization]                                                                                                                                                                                       | 38060   | Advanced | <a href="#">Display Results</a> <a href="#">More ▼</a> |             |
| <input type="checkbox"/> | 7 1 or 2 or 3 or 4                                                                                                                                                                                                                                                                                                                                       | 27319   | Advanced | <a href="#">Display Results</a> <a href="#">More ▼</a> |             |
| <input type="checkbox"/> | 8 5 or 6                                                                                                                                                                                                                                                                                                                                                 | 432375  | Advanced | <a href="#">Display Results</a> <a href="#">More ▼</a> |             |
| <input type="checkbox"/> | 9 7 and 8                                                                                                                                                                                                                                                                                                                                                | 5205    | Advanced | <a href="#">Display Results</a> <a href="#">More ▼</a> |             |
| <input type="checkbox"/> | 10 limit 9 to (english language and humans)                                                                                                                                                                                                                                                                                                              | 4831    | Advanced | <a href="#">Display Results</a> <a href="#">More ▼</a> |             |
| <input type="checkbox"/> | 11 limit 10 to (clinical trial, phase iii or clinical trial, phase iv or guideline or historical article or "review" or "scientific integrity review" or systematic reviews)                                                                                                                                                                             | 1586    | Advanced | <a href="#">Display Results</a> <a href="#">More ▼</a> |             |

*Appendix A Search strategy strand 1: Medline*
