# Supplementary material for: Choosing primary endpoints for clinical trials of health care interventions
Source: PubMed Central journal article supplement — Contemp Clin Trials Commun. 2019 Nov 12;16:100486. doi: 10.1016/j.conctc.2019.100486 (PMC6881606; doi:10.1016/j.conctc.2019.100486), 2019-11-12
Supplement: mmc2.pdf [file mmc2.pdf]

| <input type="checkbox"/> | # ▲ Searches                                                                                                                                                                                                                                                                                      | Results | Type     |
|--------------------------|---------------------------------------------------------------------------------------------------------------------------------------------------------------------------------------------------------------------------------------------------------------------------------------------------|---------|----------|
| <input type="checkbox"/> | 1 exp Endpoint Determination/ci, hi, mt, st, sn [Classification, History, Methods, Standards, Statistics & Numerical Data]                                                                                                                                                                        | 910     | Advanced |
| <input type="checkbox"/> | 2 (end?point* adj1 (biomarker* and surrogate)).mp. [mp=title, abstract, original title, name of substance word, subject heading word, floating sub-heading word, keyword heading word, protocol supplementary concept word, rare disease supplementary concept word, unique identifier, synonyms] | 526     | Advanced |
| <input type="checkbox"/> | 3 1 or 2                                                                                                                                                                                                                                                                                          | 1426    | Advanced |
| <input type="checkbox"/> | 4 limit 3 to (english language and humans)                                                                                                                                                                                                                                                        | 1215    | Advanced |

*Appendix B Search strategy strand 2: Medline*
